# Supplementary material for: Clinical-effectiveness of self-management interventions in chronic obstructive pulmonary disease: An overview of reviews
Source: PubMed Central journal article supplement — Chron Respir Dis. 2017 Feb 24;14(3):276–88. doi: 10.1177/1479972316687208 (PMC5720233; doi:10.1177/1479972316687208), 2017-02-24
Supplement: Supplement_Table_CRD-16-0061.pdf [file Supplement_Table_CRD-16-0061.pdf]

## Supplement

**Table S1.** Summary of data extracted from systematic reviews.

| Reference (year)                | Intervention and comparator               | Outcome                                           | Time (from initiation of intervention) | Sample size | Significance | ES (95% CI)                       |
|---------------------------------|-------------------------------------------|---------------------------------------------------|----------------------------------------|-------------|--------------|-----------------------------------|
| <b>Education / action plans</b> |                                           |                                                   |                                        |             |              |                                   |
| Effing (2007) <sup>24</sup>     | Self-management education and usual care  | Hospital admissions:                              |                                        |             |              |                                   |
|                                 |                                           | COPD-related hospital admissions vs. regular care | -                                      | 7 RCTs      | ++           | OR 0.64 (0.47 to 0.89); p=0.007   |
|                                 |                                           | HRQoL:                                            |                                        |             |              |                                   |
|                                 |                                           | SG-RQ total vs. usual care                        | -                                      | 7 RCTs      | +            | WMD-2.58 (-5.14 to -0.02); p=0.05 |
|                                 |                                           | SG-RQ impact vs. usual care                       | -                                      | 7 RCTs      | +            | WMD-2.83 (-5.65 to -0.02)         |
| Tan (2012) <sup>25</sup>        | Disease-specific education and usual care | Hospital admissions:                              |                                        |             |              |                                   |
|                                 |                                           | COPD-related admissions vs. usual care            | 12 months                              | 4 RCTs      | +++          | OR=0.55 (0.43 to 0.71); p<0.00001 |
|                                 |                                           | HRQoL:                                            |                                        |             |              |                                   |
|                                 |                                           | SG-RQ impact vs. usual care                       | 12 months                              | 6 RCTs      | +            | WMD-3.78 (-6.82 to -0.73); p=0.02 |
|                                 |                                           | SG-RQ total and other domains vs. usual care      | 3 and 6 months                         | 6 RCTs      | 0            | NR                                |
| Turnock (2005) <sup>13</sup>    | Action plans and usual care               | Hospital admissions:                              |                                        |             |              |                                   |
|                                 |                                           | Hospital admissions vs. usual care                | 12 months                              | 2 RCTs      | 0            | WMD 0.16 (-0.09 to 0.42)          |
|                                 |                                           | HRQoL:                                            |                                        |             |              |                                   |

| Reference (year)                              | Intervention and comparator                                                | Outcome                                                                                        | Time (from initiation of intervention) | Sample size                                                                        | Significance | ES (95% CI)                                                                                                               |
|-----------------------------------------------|----------------------------------------------------------------------------|------------------------------------------------------------------------------------------------|----------------------------------------|------------------------------------------------------------------------------------|--------------|---------------------------------------------------------------------------------------------------------------------------|
| Walters (2010) <sup>23</sup>                  | Action plans with limited patient education only for exacerbations of COPD | SG-RQ overall vs. usual care                                                                   | 6 months                               | 2 RCTs                                                                             | 0            | WMD-1.91 (-5.46 to 1.63)                                                                                                  |
|                                               |                                                                            | SG-RQ symptoms vs. usual care                                                                  | 6 months                               | 2 RCTs                                                                             | 0            | WMD-4.78 (-10.81 to 1.24)                                                                                                 |
|                                               |                                                                            | SG-RQ activity vs. usual care                                                                  | 6 months                               | 2 RCTs                                                                             | 0            | WMD-2.43 (-7.37 to 2.50)                                                                                                  |
|                                               |                                                                            | SG-RQ impact vs. usual care                                                                    | 6 months                               | 2 RCTs                                                                             | 0            | WMD-0.62 (-4.45 to 3.21)                                                                                                  |
|                                               |                                                                            | SG-RQ overall vs. usual care                                                                   | 12 months                              | 2 RCTs                                                                             | 0            | WMD-0.32 (-3.34 to 2.70)                                                                                                  |
|                                               |                                                                            | SG-RQ symptoms vs. usual care                                                                  | 12 months                              | 2 RCTs                                                                             | 0            | WMD 1.87 (-3.27 to 7.00)                                                                                                  |
|                                               |                                                                            | SG-RQ activity vs. usual care                                                                  | 12 months                              | 2 RCTs                                                                             | 0            | WMD-2.82 (-6.84 to 1.19)                                                                                                  |
|                                               |                                                                            | SG-RQ impact vs. usual care                                                                    | 12 months                              | 2 RCTs                                                                             | 0            | WMD 1.16 (-2.21 to 4.53)                                                                                                  |
|                                               |                                                                            | Hospital admission                                                                             | 12 months                              | 2 RCTs; 205 participants                                                           | 0            | MD 0.23 (-0.03 to 0.49)                                                                                                   |
|                                               |                                                                            | ED visits                                                                                      | 12 months                              | 2 RCTs; 201 participants                                                           | 0            | MD 0.37 (-0.50 to 1.24); I <sup>2</sup> =81%                                                                              |
|                                               |                                                                            | GP visits                                                                                      | 12 months                              | 3 RCTs; 256 participants                                                           | 0            | MD 0.53 (-0.45 to 1.50)                                                                                                   |
|                                               |                                                                            | Use of medications (number of courses of oral corticosteroids)                                 | 12 months                              | 2 RCTs; 200 participants                                                           | +            | MD 0.74 (0.12 to 1.35); I <sup>2</sup> =0%                                                                                |
|                                               |                                                                            | Use of medications (treated with at least one course of antibiotics for an acute exacerbation) | 6-12 months                            | 3 RCTs; 349 participants                                                           | ++           | OR 2.02 (1.29 to 3.17)                                                                                                    |
| HRQoL - SGRQ                                  | 6 and 12 months                                                            | 4 RCTs; 412 participants                                                                       | 0                                      | MD 0.54 (-1.98 to 3.05) ; I <sup>2</sup> =3.1% (NS at 6 months or 12 months alone) |              |                                                                                                                           |
| <b>Complex interventions with a SMS focus</b> |                                                                            |                                                                                                |                                        |                                                                                    |              |                                                                                                                           |
| Dickens (2013) <sup>15</sup>                  | Complex interventions that reduce urgent care use in COPD                  | Use of urgent healthcare                                                                       | 1-24 months                            | 32 RCTs; 3,941 participants                                                        | +++          | The odds of urgent healthcare use were 32% lower in the intervention group; OR 0.68 (0.57 to 0.80). I <sup>2</sup> =37.4% |
| Kruis                                         | Integrated disease                                                         | QoL:                                                                                           |                                        |                                                                                    |              |                                                                                                                           |

| Reference (year)     | Intervention and comparator                                                                                                              | Outcome                                                                                  | Time (from initiation of intervention) | Sample size                   | Significance     | ES (95% CI)                                                                                                                                                                                                                                                                                                                     |
|----------------------|------------------------------------------------------------------------------------------------------------------------------------------|------------------------------------------------------------------------------------------|----------------------------------------|-------------------------------|------------------|---------------------------------------------------------------------------------------------------------------------------------------------------------------------------------------------------------------------------------------------------------------------------------------------------------------------------------|
| (2013) <sup>26</sup> | management interventions and controls (varying from usual care or no treatment to single interventions, mono-disciplinary interventions) | SGRQ – Short term                                                                        | 3-12 months                            | 13 studies; 1425 participants | +++<br>(p<0.001) | MD -3.71 in favour of IDM (-5.83 to -1.59); I <sup>2</sup> = 56%                                                                                                                                                                                                                                                                |
|                      |                                                                                                                                          | SGRQ – Long term                                                                         | 18, 24 months                          | 2 studies; 189 participants   | 0                | MD -0.22 (-7.43 to 6.99); I <sup>2</sup> = 54%                                                                                                                                                                                                                                                                                  |
|                      |                                                                                                                                          | Exercise capacity:<br>6MWD – Short term                                                  | 12 months                              | 14 studies; 871 participants  | +++              | Improved 6MWD by a statistically and clinically relevant 43.86 meters (21.83 to 65.89); I <sup>2</sup> = 83%.<br><br>Restriction to studies with adequate allocation concealment reduced effect estimate to 15.15 meters, still statistically significant (95% CI 6.37 to 23.93, P < 0.001), but no longer clinically relevant. |
|                      |                                                                                                                                          | 6MWD – Long term                                                                         | 24 months                              | 2 studies; 184 participants   | ++               | Improved 6MWD by 16.8 meters (MD 16.84; 3.01 to 30.67), I <sup>2</sup> = 0%                                                                                                                                                                                                                                                     |
|                      |                                                                                                                                          | Maximal exercise capacity (Watts) using the cycle ergometer test                         |                                        | 4 studies; 298 participants   | +++              | IDM statistically significantly improved the maximal exercise capacity by 7 Watts (MD 6.99; 2.96 to 11.02, P < 0.0001)                                                                                                                                                                                                          |
|                      |                                                                                                                                          | Exacerbations:<br>Number of patients experiencing at least one exacerbation - short-term | 12 months                              | 2 studies; 407 participants   | 0                | OR 1.21 (0.77 to 1.91); homogenous. P=0.42; No statistically or clinically relevant difference between groups                                                                                                                                                                                                                   |
|                      |                                                                                                                                          | Number of patients experiencing at least one exacerbation - long-term                    | 24 months                              | 2 studies; 301 participants   | 0                | OR 1.53 (0.90 to 2.60) P = 0.12; homogenous.                                                                                                                                                                                                                                                                                    |

| Reference (year) | Intervention and comparator | Outcome                                       | Time (from initiation of intervention) | Sample size                   | Significance | ES (95% CI)                                                                                                                                                            |
|------------------|-----------------------------|-----------------------------------------------|----------------------------------------|-------------------------------|--------------|------------------------------------------------------------------------------------------------------------------------------------------------------------------------|
|                  |                             | Hospital admissions, all causes - short-term  | 12 months                              | 2 studies; 226 participants   | 0            | OR 0.62 (0.36 to 1.07) P = 0.49. I <sup>2</sup> = 0%                                                                                                                   |
|                  |                             | Hospital admissions, all causes - long-term   | 24 months                              | 2 studies; 283 participants   | 0            | OR 0.78 (0.38 to 1.57) P=0.50; I <sup>2</sup> = 53%                                                                                                                    |
|                  |                             | Respiratory-related admissions - short-term   | 12 months                              | 7 studies; 1153 participants  | +            | OR 0.68 (0.47 to 0.99) P = 0.04; homogenous                                                                                                                            |
|                  |                             | Respiratory-related admissions - long-term    | 24 months                              | 1 study; 179 participants     | 0            | OR 0.59 (0.28 to 1.22) P = 0.16                                                                                                                                        |
|                  |                             | Hospital days per patient - short-term        | 12 months                              | 6 studies; 741 participants   | ++           | Patients treated with IDM on average discharged nearly 4 days earlier compared to control, CI 6 to 2 days (MD -3.78; -5.90 to -1.67, P < 0.001); I <sup>2</sup> = 55%. |
|                  |                             | Hospital days per patient - long-term         | 24 months                              | 1 study; 175 participants     | 0            | MD 0.60 (-3.01 to 4.21) P = 0.74                                                                                                                                       |
|                  |                             | Emergency Department (ED) visits - short-term | 12 months                              | 4 studies; 1161 participants  | 0            | OR 0.64 (0.33 to 1.25) I <sup>2</sup> = 71%                                                                                                                            |
|                  |                             | Dyspnoea - MRC Dyspnoea Scale                 |                                        | 3 studies; 345 participants   | +++          | Dyspnoea improved in IDM group by -0.30 points (MD -0.30; -0.48 to -0.11, I <sup>2</sup> = 0%, P < 0.001)                                                              |
|                  |                             | Dyspnoea – Borg score                         |                                        | 3 studies; 145 participants   | 0            | MD 0.14 (-0.70 to 0.98) P = 0.74, I <sup>2</sup> = 39%                                                                                                                 |
|                  |                             | Mortality                                     | 12 months (4)                          | 4 studies; 1,113 participants | 0            | Short-term (OR 0.96; 0.52 to 1.74, P = 0.33; I <sup>2</sup> = 59%).                                                                                                    |
|                  |                             |                                               | 24 months (1)                          | 1 study; 122 participants     |              | Long-term (OR 0.45; 0.16 to 1.28, P = 0.13)                                                                                                                            |

| Reference (year)             | Intervention and comparator                                                                | Outcome                                                                    | Time (from initiation of intervention) | Sample size                   | Significance                        | ES (95% CI)                                                                                                     |
|------------------------------|--------------------------------------------------------------------------------------------|----------------------------------------------------------------------------|----------------------------------------|-------------------------------|-------------------------------------|-----------------------------------------------------------------------------------------------------------------|
| Zwerink (2014) <sup>19</sup> | Self management for patients with COPD                                                     | Lung function:                                                             |                                        |                               |                                     |                                                                                                                 |
|                              |                                                                                            | Anxiety and depression - HADS                                              |                                        | 2 studies; 316 participants   | 0                                   | Anxiety (MD 0.22; -0.41 to 0.85, I <sup>2</sup> = 0%), depression (MD 0.21, -0.39 to 0.81, I <sup>2</sup> = 0%) |
|                              |                                                                                            | Anxiety and depression - MACL                                              |                                        | 1 study (55 participants)     | 0                                   | -                                                                                                               |
|                              |                                                                                            | Hospitalisations:                                                          |                                        |                               |                                     |                                                                                                                 |
|                              |                                                                                            | Respiratory-related hospitalisations vs. usual care or active intervention | 2-24 months                            | 10 studies; 1749 participants | +++                                 | OR 0.57 (0.43 to 0.75); P<0.001                                                                                 |
|                              |                                                                                            | All cause hospitalisations vs. usual care or active intervention           | 2-24 months                            | 7 studies, 1365 participants  | +                                   | OR 0.60 (0.40 to 0.89); P=0.011                                                                                 |
|                              |                                                                                            | HRQoL:                                                                     |                                        |                               |                                     |                                                                                                                 |
|                              |                                                                                            | SGRQ intervention vs. usual care or active intervention                    | 2-24 months                            | 10 RCTs; 1413 participants    | +++                                 | MD -3.51 (-5.37 to -1.65); P<0.001                                                                              |
|                              |                                                                                            | Mortality:                                                                 |                                        |                               |                                     |                                                                                                                 |
|                              |                                                                                            |                                                                            | 2-24 months                            | 9 studies; 2134 participants  | 0                                   | OR 0.79 (0.58 to 1.07); P=0.13                                                                                  |
|                              | Dyspnoea:                                                                                  |                                                                            |                                        |                               |                                     |                                                                                                                 |
|                              | Medical Research Council Scale ((m)MRC) intervention vs. usual care or active intervention | 2-24 months                                                                | 3 studies; 119 participants            | ++                            | MD -0.83 (-1.36 to -0.30); P=0.002  |                                                                                                                 |
|                              | Exercise capacity:                                                                         |                                                                            |                                        |                               |                                     |                                                                                                                 |
|                              | 6MWD vs. usual care or active intervention                                                 | 2-24 months                                                                | 6 studies; 570 participants            | 0                             | MD 33.69 m (-9.12 to 76.50); P=0.12 |                                                                                                                 |
| Jordan                       | Supported self-                                                                            | Quality of life: SRGQ                                                      | 2-12 month                             | 6 RCTs; 845 participants      | 0                                   | MD -3.84 (-6.40 to -1.29) P=0.321                                                                               |

| Reference (year)                 | Intervention and comparator                          | Outcome                     | Time (from initiation of intervention) | Sample size                | Significance                                                                                                  | ES (95% CI)                                                                    |
|----------------------------------|------------------------------------------------------|-----------------------------|----------------------------------------|----------------------------|---------------------------------------------------------------------------------------------------------------|--------------------------------------------------------------------------------|
| (2015) <sup>18</sup>             | management for patients with moderate to severe COPD | Emergency department visits | 2-6 months                             | 5 RCTs; 932 participants   | NR                                                                                                            | Not combined                                                                   |
| Hospitalisations                 |                                                      | 12 months                   | 7 RCTs; 1,217 participants             | ++                         | HR 0.78 (0.52 to 1.17); P = 0.002                                                                             |                                                                                |
| Mortality                        |                                                      | 2-12 months                 | 6 RCTs; 1,179 participants             | 0                          | HR 1.07 (0.74 to 1.54); P=0.714                                                                               |                                                                                |
| <b>Pulmonary rehabilitation</b>  |                                                      |                             |                                        |                            |                                                                                                               |                                                                                |
| McCarthy (2015) <sup>14</sup>    | Pulmonary rehabilitation for COPD                    | HRQoL: CRQ - Fatigue:       |                                        | 19 RCTs; 1291 participants | +++                                                                                                           | MD 0.68 (0.45 to 0.92); P<0.001; Tau <sup>2</sup> = 0.15; I <sup>2</sup> = 64% |
| HRQoL: CRQ - Emotional function: |                                                      |                             | 19 RCTs; 1291 participants             | +++                        | MD 0.56 (0.34 to 0.78); P<0.001; Tau <sup>2</sup> = 0.12; I <sup>2</sup> = 58%                                |                                                                                |
| HRQoL: CRQ - Mastery:            |                                                      |                             | 19 RCTs; 1212 participants             | +++                        | MD 0.71 (0.47 to 0.95); P<0.001; Tau <sup>2</sup> = 0.16; I <sup>2</sup> = 63%;                               |                                                                                |
| HRQoL: CRQ - Dyspnoea:           |                                                      |                             | 19 RCTs; 1283 participants             | +++                        | MD 0.79 (0.56 to 1.03); 19 trials; 1283 participants; P<0.001; Tau <sup>2</sup> = 0.15; I <sup>2</sup> = 63%; |                                                                                |
| HRQoL: SGRQ total                |                                                      |                             | 19 trials; 1146 participants;          | +++                        | MD -6.89 (-9.26 to -4.52); P<0.001; Tau <sup>2</sup> = 13.17; I <sup>2</sup> = 59%;                           |                                                                                |
| HRQoL: SGRQ symptoms             |                                                      |                             | 19 trials; 1153 participants;          | +++                        | MD -5.09 (-7.69 to -2.49); P<0.001; Tau <sup>2</sup> = 7.79; I <sup>2</sup> = 26%;                            |                                                                                |
| HRQoL: SGRQ impact               |                                                      |                             | 19 trials; 1149 participants;          | +++                        | MD -7.23 (-9.91 to -4.55); P<0.001; Tau <sup>2</sup> = 17.94; I <sup>2</sup> = 58%;                           |                                                                                |
| HRQoL: SGRQ activity             |                                                      |                             | 19 trials; 1148 participants;          | +++                        | MD -6.08 (-9.28 to -2.88); P<0.001; Tau <sup>2</sup> = 27.01; I <sup>2</sup> = 64%;                           |                                                                                |
|                                  |                                                      | Maximal exercise capacity   |                                        | 16 studies; 779            | ++                                                                                                            | MD 6.77 (1.89 to 11.65); P=0.007; Tau <sup>2</sup>                             |

| Reference (year)          | Intervention and comparator               | Outcome                                                                            | Time (from initiation of intervention) | Sample size                                                       | Significance | ES (95% CI)                                                                            |
|---------------------------|-------------------------------------------|------------------------------------------------------------------------------------|----------------------------------------|-------------------------------------------------------------------|--------------|----------------------------------------------------------------------------------------|
|                           |                                           |                                                                                    |                                        | participants                                                      |              | = 40.97; I <sup>2</sup> = 74%;                                                         |
|                           |                                           | Functional exercise capacity – 6MWD                                                |                                        | 38 trials; 1879 participants; 1012 actively treated, 867 controls | +++          | MD 43.93 m (32.64 to 55.21); P<0.001; Tau <sup>2</sup> = 713.49; I <sup>2</sup> = 74%; |
|                           |                                           | Functional exercise capacity – ISWT                                                |                                        | 8 trials; 694 participants                                        | +++          | MD 39.77 (22.38 to 57.15); P<0.001; Tau <sup>2</sup> = 181.56; I <sup>2</sup> = 32%    |
| <b>Telehealth</b>         |                                           |                                                                                    |                                        |                                                                   |              |                                                                                        |
| Cruz (2014) <sup>21</sup> | Home telemonitoring effectiveness in COPD | Health care utilisation:                                                           |                                        |                                                                   |              |                                                                                        |
|                           |                                           | Hospitalisation rates                                                              |                                        | 6 RCTs, 2 NRCTs; 486 participants                                 | +            | RR 0.72 (0.53 to 0.98); Z=2.12; p=0.034; I <sup>2</sup> =4.73%                         |
|                           |                                           | Mean number of hospitalisations                                                    |                                        | 3 RCTs, 1 NRCT; 244 participants                                  | 0            | SMD -0.06 (-0.32 to 0.19); Z=0.50; p=0.617; I <sup>2</sup> =16.42%                     |
|                           |                                           | Length of hospital stay                                                            |                                        | 3 RCTs, 1 NRCT; 244 participants                                  | 0            | SMD 0.06 (-0.19 to 0.31); Z=0.48; p=0.635; I <sup>2</sup> =0%                          |
|                           |                                           | ED visit rates                                                                     |                                        | 4 RCTs; 194 participants                                          | 0            | RR 0.68 (0.38 to 1.18); Z=1.34; p=0.179; I <sup>2</sup> =22.53%                        |
|                           |                                           | Mean number of ED visits                                                           | 4-6 months                             | 1 RCT, 1NRCT; 160 participants                                    | 0            | SMD 0.20 (-0.49 to 0.88); Z=0.56; p=0.576). I <sup>2</sup> =74.81%                     |
|                           |                                           | Health outcomes:                                                                   |                                        |                                                                   |              |                                                                                        |
|                           |                                           | Mortality rates                                                                    |                                        | 3 RCTs, 1 NRCT; 294 participants                                  | 0            | RR 1.43 (0.40 to 5.03); Z=0.55; p=0.582; I <sup>2</sup> =0%                            |
|                           |                                           | Mean change (i.e., posttest–pretest) of total and sub-dimension scores of the SGRQ |                                        | 2 RCTs ;                                                          | +            | SMD 0.53 (-0.97 to -0.09); Z=2.35; p=0.019; I <sup>2</sup> =17.74%                     |
| Kamei                     | Telehome monitoring-                      | Health care utilisation                                                            |                                        |                                                                   |              |                                                                                        |



| Reference (year)                                                           | Intervention and comparator                                                          | Outcome                                                                                                              | Time (from initiation of intervention) | Sample size                                        | Significance | ES (95% CI)                                            |
|----------------------------------------------------------------------------|--------------------------------------------------------------------------------------|----------------------------------------------------------------------------------------------------------------------|----------------------------------------|----------------------------------------------------|--------------|--------------------------------------------------------|
| (2012) <sup>20</sup>                                                       | based telenursing for patients with COPD (included patients with mainly severe COPD) | Hospitalisation in patients with severe and very severe COPD                                                         | 3-12 months                            | 4 RCTs, 2 NRCT; 450 participants                   | ++           | RR 0.81 (0.69 to 0.95); I <sup>2</sup> =0%             |
|                                                                            |                                                                                      | Hospitalisation in patients with moderate COPD                                                                       | 3-12 months                            | 4 RCTs, 2 NRCT; 100 participants                   | 0            | RR 0.55 (0.22 to 1.36); I <sup>2</sup> not reported.   |
|                                                                            |                                                                                      | Hospitalisation in all COPD patients                                                                                 | 3-12 months                            | 4 RCTs, 2 NRCT; 550 participants                   | +            | RR 0.80 (0.68 to 0.94); I <sup>2</sup> =0%             |
|                                                                            |                                                                                      | Comparison of hospitalisation by THMTN duration for patients receiving THMTN for ≤3, 6 and 12months compared to CT/C | ≤3 months                              | 137 patients                                       | 0            | RR 0.64 (0.31 to 1.33);                                |
|                                                                            |                                                                                      |                                                                                                                      | 6 months                               | 155 patients                                       |              | RR 0.78 (0.50 to 1.20);                                |
|                                                                            |                                                                                      |                                                                                                                      | 12 months                              | 258 patients                                       |              | RR 0.80 (0.64 to 1.01);                                |
|                                                                            |                                                                                      | Number of emergency department visits                                                                                | 3-12 months                            | 4 RCTs; 335 participants                           | +++          | RR 0.52 (0.41 to 0.65); I <sup>2</sup> =0%             |
|                                                                            |                                                                                      | Disease exacerbations in severe and very severe COPD patients 3 months after THMTN                                   | 3-12 months                            | 2 RCTs; 138 participants                           | +++          | RR 0.57 (0.41 to 0.79); I <sup>2</sup> =0%             |
|                                                                            |                                                                                      | Mean number of hospitalisations in severe COPD patients                                                              | 6-12 months                            | 5 RCTs; 453 participants                           | ++           | MD -0.14 (-0.19 to -0.09); P<0.001; I <sup>2</sup> =0% |
| Mean duration of bed days of care in moderate to very severe COPD patients | 1-6 months                                                                           | 2 RCTs; 215 participants                                                                                             | ++                                     | MD -0.76 (-0.79 to -0.73) P<0.001                  |              |                                                        |
| Mortality in moderate to very severe COPD patients                         | 1-12 months                                                                          | 5 RCT; 374 patients                                                                                                  | 0                                      | RR 1.36 (0.77 to 2.41); P=0.29; I <sup>2</sup> =0% |              |                                                        |
| Lundell (2014) <sup>28</sup>                                               | Telehealthcare for COPD (making pulmonary rehab more accessible)                     | Physical activity                                                                                                    | 12 months                              | 1 RCT; 125 participants                            | +++          | SMD -0.081 (-0.918 to 0.755)                           |
|                                                                            |                                                                                      | Physical capacity - 6MWD                                                                                             |                                        | 6 RCTs; 533 participants                           | 0            | MD -1.3 m (-8.1 to 5.5)                                |
|                                                                            |                                                                                      | Dyspnoea :                                                                                                           |                                        | 7 RCTs; 826                                        | 0            | SMD 0.088 (0.056 to 0.233); P=0.232                    |
|                                                                            |                                                                                      | Chronic Respiratory                                                                                                  |                                        |                                                    |              |                                                        |

| Reference (year)                  | Intervention and comparator                                                                 | Outcome                                                                                                                               | Time (from initiation of intervention) | Sample size               | Significance | ES (95% CI)                                                                                                 |
|-----------------------------------|---------------------------------------------------------------------------------------------|---------------------------------------------------------------------------------------------------------------------------------------|----------------------------------------|---------------------------|--------------|-------------------------------------------------------------------------------------------------------------|
|                                   |                                                                                             | Questionnaire, Dyspnoea subscale (CRQ-D), Medical Research Council (MRC) Dyspnoea scale, and Shortness of Breath Questionnaire (SOBQ) |                                        |                           |              |                                                                                                             |
| McLean (2011) <sup>27</sup>       | Telehealthcare for COPD                                                                     | Quality of life: SRGQ                                                                                                                 |                                        | 2 RCTs; 253 participants) | 0            | MD -6.57 (-13.62 to 0.48), P=0.07<br>minimally clinically significant change although the CIs are very wide |
|                                   |                                                                                             | Emergency department visits                                                                                                           | 12 months                              | 3 RCTs; 449 participants  | ++           | OR 0.27 (0.11 to 0.66) P=0.005                                                                              |
|                                   |                                                                                             | Hospitalisations                                                                                                                      | 12 months                              | 4 RCTs; 604 participants  | +++          | OR 0.46 (0.33 to 0.65); P < 0.00001                                                                         |
|                                   |                                                                                             | Deaths                                                                                                                                | 12 month                               | 3 RCTs; 503 participants  | 0            | OR 1.05 (0.63 to 1.75); P=0.86                                                                              |
| <b>Outreach nursing programme</b> |                                                                                             |                                                                                                                                       |                                        |                           |              |                                                                                                             |
| Wong (2012) <sup>29</sup>         | Home care by outreach nursing vs. usual care, without respiratory nurse/health worker input | Hospital admissions:<br>Hospitalisations vs. routine care                                                                             | –                                      | 5 RCTs                    | 0            | Peto OR 1.01 (0.71 to 1.44); p=0.95                                                                         |
|                                   |                                                                                             | HRQoL:<br>SG-RQ total vs. routine care                                                                                                | –                                      | 4 RCTs                    | +            | MD -2.60 (-4.81 to -0.39); p=0.02                                                                           |
|                                   |                                                                                             | SG-RQ activity vs. routine care                                                                                                       | –                                      | 3 RCTs                    | 0            | NR                                                                                                          |
|                                   |                                                                                             | SG-RQ impact vs. routine care                                                                                                         | –                                      | 3 RCTs                    | 0            | NR                                                                                                          |
|                                   |                                                                                             | SG-RQ symptoms vs. routine care                                                                                                       | –                                      | 3 RCTs                    | 0            | NR                                                                                                          |

Abbreviation: NR: Not reported; SMS: Short Messaging Service; SGRQ: St. George's Respiratory Questionnaire; 6MWD: 6 minute walking distance; MACL: Mood Adjective Check List; CT/C: Conventional treatment/care; ISWT: Incremental shuttle walk test.
